# Supplementary material for: Corn-Soy-Blend Fortified with Phosphorus to Prevent Refeeding Hypophosphatemia in Undernourished Piglets
Source: PLoS One. 2017 Jan 12;12(1):e0170043. doi: 10.1371/journal.pone.0170043 (PMC5231358; doi:10.1371/journal.pone.0170043)
Supplement: S1 Data — (XLS) [file pone.0170043.s001.xls]

## Sheet: Baseline Weight_length_circum
id	treatment	weight, kg	length, cm	circumference, cm
21	CSB+	10.28	56	46
27	CSB+	7.88	53	42
30	CSB+	9.32	58	46
37	CSB+	4.98	46	40
63	CSB+	6.94	50.2	40
70	CSB+	7.48	55	44
81	CSB+	6.76	50	40.4
97	CSB+	9.38	57	45.4
113	CSB+	8.88	57	44
26	CSB+ Permeate	6.2	56	41
64	CSB+ Permeate	9.7	56	47.4
65	CSB+ Permeate	8.68	58.6	44.8
69	CSB+ Permeate	8.2	58.5	44
76	CSB+ Permeate	7.46	53.9	43
84	CSB+ Permeate	5.2	49.5	39
95	CSB+ Permeate	7.54	54.4	42.5
103	CSB+ Permeate	8.18	56.5	45
111	CSB+ Permeate	5.06	51	38.2
17	CSB++	6.12	47.5	40
23	CSB++	7.06	50.5	41.2
33	CSB++	9.68	56	45.4
47	CSB++	8.68	51.5	43
74	CSB++	7.46	51.4	43.1
85	CSB++	5.68	47	40
98	CSB++	9.3	52	46
106	CSB++	6.16	56	40.9
119	CSB++	8.12	54.2	44.4
120	CSB++	7.92	55	42.5
5	Maize	8.62	54.5	44
8	Maize	8.06	55	41.8
36	Maize	8.38	56.5	46.2
59	Maize	6.66	53	42.5
73	Maize	7.94	56	42
83	Maize	5.58	47.5	38.7
109	Maize	6.18	52.5	40.1
118	Maize	6.36	48.5	41.6
