# Supplementary material for: Corn-Soy-Blend Fortified with Phosphorus to Prevent Refeeding Hypophosphatemia in Undernourished Piglets
Source: PLoS One. 2017 Jan 12;12(1):e0170043. doi: 10.1371/journal.pone.0170043 (PMC5231358; doi:10.1371/journal.pone.0170043)
Supplement: S2 Data — (XLS) [file pone.0170043.s002.xls]

## Sheet: Baseline_blood
id	treatment	Hem	Alb	P	Mg	Ca	K
21	CSB+	5.1	20.36	2.28	0.74	1.14	5.45
27	CSB+	5	21.54	2.34	0.79	1.14	6.02
30	CSB+	5.8	18.47	2.06	0.68	1.12	4.47
37	CSB+	4	17.48	1.66	0.64	1.17	4.61
63	CSB+	5.6	12.82	1.32	0.58	1.21	4.83
70	CSB+	5.3	18.92	1.78	0.62	0.99	5.58
81	CSB+	5.3
97	CSB+	6.2	22.14	1.74	0.61	1.13	5.64
113	CSB+	6.5	19.16	1.49	0.68	1.32	6.49
26	CSB+ Permeate	7.6	29.15	2.12	0.86	1.14	4.71
64	CSB+ Permeate	5.6	14.87	1.61	0.59	1.04	4.16
65	CSB+ Permeate	6	18	1.79	0.75	1.17	5.19
69	CSB+ Permeate	6.4	16.21	1.41	0.56	1.07	4.86
76	CSB+ Permeate	7	24.67	1.94	0.86	1.28	4.23
84	CSB+ Permeate
95	CSB+ Permeate	5.4	17.77	1.65	0.59	1.03	4.91
103	CSB+ Permeate	5.4	17.3	1.5	0.79	1.27	5.77
111	CSB+ Permeate	4.7	21.33	1.25	0.85	1.59	5.34
17	CSB++	5.9	22.73	2.45	0.8	0.99	6.57
23	CSB++	6.4	23.9	1.55	0.73	1.18	5.52
33	CSB++	6	18.24	2.17	0.76	1.21	7.12
47	CSB++	5.8	17.72	1.93	0.66	1.12	5.87
74	CSB++	6.1	18.61	1.86	0.55	1.05	5.8
85	CSB++	5.1	18.83	1.81	0.64	1.08	5.3
98	CSB++	6.6	24.92	2.21	0.74	1.07	5.02
106	CSB++	6.7	34.29	1.44	0.91	1.53	3.04
119	CSB++	6.8	19.17	1.22	0.49	0.99	3.14
120	CSB++	6.3	18.06	1.61	0.75	1.24	5.13
5	Maize	6.3
8	Maize	6.1	18.42	2.25	0.61	0.98	5.37
36	Maize	5.8	18.31	1.89	0.66	1.21	6.45
59	Maize	6.2
73	Maize	5.5	15.64	1.91	0.65	1.05	4.91
83	Maize	4.7	14.49	1.7	0.63	0.96	3.83
109	Maize	5.9	24.08	1.35	0.75	1.51	5.03
118	Maize	5.5	18.31	1.5	0.69	1.13	4.24
