# Supplementary material for: Corn-Soy-Blend Fortified with Phosphorus to Prevent Refeeding Hypophosphatemia in Undernourished Piglets
Source: PLoS One. 2017 Jan 12;12(1):e0170043. doi: 10.1371/journal.pone.0170043 (PMC5231358; doi:10.1371/journal.pone.0170043)
Supplement: S3 Data — (XLS) [file pone.0170043.s003.xls]

## Sheet: Classifification
id	treatment	weight, kg	weight_pred, kg	wfa, %	length, cm	hfa, %	wfh, %	wasting
21	CSB+	10.28	10.7643	39.6784	56	70.5068	95.5012	1
27	CSB+	7.88	9.43045	30.415	53	66.7296	83.5591	1
30	CSB+	9.32	11.7112	35.973	58	73.0249	79.5822	2
37	CSB+	4.98	6.71009	19.2216	46	57.9163	74.2166	2
63	CSB+	6.94	8.27747	26.7868	50.2	63.2043	83.842	1
70	CSB+	7.48	10.3082	28.8711	55	69.2477	72.5635	2
81	CSB+	6.76	8.19846	26.092	50	62.9525	82.4545	1
97	CSB+	9.38	11.2319	36.2046	57	71.7658	83.5122	1
113	CSB+	8.88	11.2319	34.2747	57	71.7658	79.0606	2
26	CSB+ Permeate	6.2	10.7643	23.9306	56	70.5068	57.598	3
64	CSB+ Permeate	9.7	10.7643	37.4397	56	70.5068	90.113	1
65	CSB+ Permeate	8.68	12.0044	33.5028	58.6	73.7803	72.3071	2
69	CSB+ Permeate	8.2	11.9552	31.6501	58.5	73.6544	68.5894	3
76	CSB+ Permeate	7.46	9.8198	28.7939	53.9	67.8628	75.9689	2
84	CSB+ Permeate	5.2	8.00286	20.0708	49.5	62.3229	64.9768	3
95	CSB+ Permeate	7.54	10.0401	29.1026	54.4	68.4923	75.0989	2
103	CSB+ Permeate	8.18	10.9966	31.5729	56.5	71.1363	74.3864	2
111	CSB+ Permeate	5.06	8.59795	19.5304	51	64.2115	58.8512	3
17	CSB++	6.12	7.24787	23.6218	47.5	59.8048	84.4386	1
23	CSB++	7.06	8.39682	27.25	50.5	63.582	84.0795	1
33	CSB++	9.68	10.7643	37.3625	56	70.5068	89.9272	1
47	CSB++	8.68	8.80187	33.5028	51.5	64.841	98.6154	1
74	CSB++	7.46	8.76087	28.7939	51.4	64.7151	85.1514	1
85	CSB++	5.68	7.06592	21.9235	47	59.1753	80.3859	1
98	CSB++	9.3	9.00859	35.8958	52	65.4706	103.235	1
106	CSB++	6.16	10.7643	23.7762	56	70.5068	57.2264	3
119	CSB++	8.12	9.95163	31.3413	54.2	68.2405	81.5947	1
120	CSB++	7.92	10.3082	30.5694	55	69.2477	76.832	2
5	Maize	8.62	10.0845	33.2712	54.5	68.6182	85.4778	1
8	Maize	8.06	10.3082	31.1097	55	69.2477	78.1901	2
36	Maize	8.38	10.9966	32.3448	56.5	71.1363	76.2052	2
59	Maize	6.66	9.43045	25.706	53	66.7296	70.6223	2
73	Maize	7.94	10.7643	30.6465	56	70.5068	73.7626	2
83	Maize	5.58	7.24787	21.5375	47.5	59.8048	76.9881	2
109	Maize	6.18	9.21811	23.8534	52.5	66.1001	67.0419	3
118	Maize	6.36	7.61991	24.5481	48.5	61.0639	83.4656	1
