# Supplementary material for: Corn-Soy-Blend Fortified with Phosphorus to Prevent Refeeding Hypophosphatemia in Undernourished Piglets
Source: PLoS One. 2017 Jan 12;12(1):e0170043. doi: 10.1371/journal.pone.0170043 (PMC5231358; doi:10.1371/journal.pone.0170043)
Supplement: S4 Data — (XLS) [file pone.0170043.s004.xls]

## Sheet: Weight_RM_n36
id	treatment	week	date	weight, kg
21	CSB+	0	2010-11-24	10.28
21	CSB+	1	2010-11-30	11.18
21	CSB+	2	2010-12-07	12.58
21	CSB+	3	2010-12-15	13.02
27	CSB+	0	2010-11-24	7.88
27	CSB+	1	2010-11-30	8.06
27	CSB+	2	2010-12-07	9.34
27	CSB+	3	2010-12-15	10.24
30	CSB+	0	2010-11-24	9.32
30	CSB+	1	2010-11-30	10.22
30	CSB+	2	2010-12-07	10.7
30	CSB+	3	2010-12-15	12.04
37	CSB+	0	2010-11-24	4.98
37	CSB+	1	2010-11-30	5.68
37	CSB+	2	2010-12-07	5.98
37	CSB+	3	2010-12-14	6.44
63	CSB+	0	2010-11-24	6.94
63	CSB+	1	2010-11-30	7.24
63	CSB+	2	2010-12-07	7.88
63	CSB+	3	2010-12-14	8.02
70	CSB+	0	2010-11-24	7.48
70	CSB+	1	2010-11-30	7.68
70	CSB+	2	2010-12-07	8.38
70	CSB+	3	2010-12-14	9.48
81	CSB+	0	2010-11-24	6.76
81	CSB+	1	2010-11-30	6.88
81	CSB+	2	2010-12-07	7.28
81	CSB+	3	2010-12-14	7.84
97	CSB+	0	2010-11-24	9.38
97	CSB+	1	2010-11-30	10.22
97	CSB+	2	2010-12-07	11.84
97	CSB+	3	2010-12-15	13.3
113	CSB+	0	2010-11-24	8.88
113	CSB+	1	2010-11-30	9.94
113	CSB+	2	2010-12-07	10.66
113	CSB+	3	2010-12-15	11.9
26	CSB+ Permeate	0	2010-11-24	6.2
26	CSB+ Permeate	1	2010-11-30	6.4
26	CSB+ Permeate	2	2010-12-07	7.6
26	CSB+ Permeate	3	2010-12-14	7.26
64	CSB+ Permeate	0	2010-11-24	9.7
64	CSB+ Permeate	1	2010-11-30	10.9
64	CSB+ Permeate	2	2010-12-07	12.02
64	CSB+ Permeate	3	2010-12-15	12.94
65	CSB+ Permeate	0	2010-11-24	8.68
65	CSB+ Permeate	1	2010-11-30	8.92
65	CSB+ Permeate	2	2010-12-07	9.46
65	CSB+ Permeate	3	2010-12-15	10.24
69	CSB+ Permeate	0	2010-11-24	8.2
69	CSB+ Permeate	1	2010-11-30	9.2
69	CSB+ Permeate	2	2010-12-07	10.2
69	CSB+ Permeate	3	2010-12-15	11.48
76	CSB+ Permeate	0	2010-11-24	7.46
76	CSB+ Permeate	1	2010-11-30	7.64
76	CSB+ Permeate	2	2010-12-07	7.92
76	CSB+ Permeate	3	2010-12-14	8.18
84	CSB+ Permeate	0	2010-11-24	5.2
95	CSB+ Permeate	0	2010-11-24	7.54
95	CSB+ Permeate	1	2010-11-30	8.34
95	CSB+ Permeate	2	2010-12-07	9.48
95	CSB+ Permeate	3	2010-12-14	10.02
103	CSB+ Permeate	0	2010-11-24	8.18
103	CSB+ Permeate	1	2010-11-30	8.82
103	CSB+ Permeate	2	2010-12-07	8.8
103	CSB+ Permeate	3	2010-12-15	8.9
111	CSB+ Permeate	0	2010-11-24	5.06
111	CSB+ Permeate	1	2010-11-30	6.34
111	CSB+ Permeate	2	2010-12-07	6.88
111	CSB+ Permeate	3	2010-12-14	7.16
17	CSB++	0	2010-11-24	6.12
17	CSB++	1	2010-11-30	6.7
17	CSB++	2	2010-12-07	7.34
17	CSB++	3	2010-12-15	8.88
23	CSB++	0	2010-11-24	7.06
23	CSB++	1	2010-11-30	8.7
23	CSB++	2	2010-12-07	9.08
23	CSB++	3	2010-12-15	7.7
33	CSB++	0	2010-11-24	9.68
33	CSB++	1	2010-11-30	10.42
33	CSB++	2	2010-12-07	10.68
33	CSB++	3	2010-12-15	10.58
47	CSB++	0	2010-11-24	8.68
47	CSB++	1	2010-11-30	7.42
47	CSB++	2	2010-12-07	8.32
47	CSB++	3	2010-12-15	8.42
74	CSB++	0	2010-11-24	7.46
74	CSB++	1	2010-11-30	8.08
74	CSB++	2	2010-12-07	8.94
74	CSB++	3	2010-12-15	10.52
85	CSB++	0	2010-11-24	5.68
85	CSB++	1	2010-11-30	6.32
85	CSB++	2	2010-12-07	5.7
98	CSB++	0	2010-11-24	9.3
98	CSB++	1	2010-11-30	10.72
98	CSB++	2	2010-12-07	12.16
98	CSB++	3	2010-12-15	14.82
106	CSB++	0	2010-11-24	6.16
119	CSB++	0	2010-11-24	8.12
119	CSB++	1	2010-11-30	8.24
119	CSB++	2	2010-12-07	9.46
119	CSB++	3	2010-12-15	10.46
120	CSB++	0	2010-11-24	7.92
120	CSB++	1	2010-11-30	8.86
120	CSB++	2	2010-12-07	9.82
120	CSB++	3	2010-12-15	10.7
5	Maize	0	2010-11-24	8.62
5	Maize	1	2010-11-30	8.1
5	Maize	2	2010-12-07	8
5	Maize	3	2010-12-15	7.96
8	Maize	0	2010-11-24	8.06
8	Maize	1	2010-11-30	8.08
8	Maize	2	2010-12-07	7.98
8	Maize	3	2010-12-15	8.38
36	Maize	0	2010-11-24	8.38
36	Maize	1	2010-11-30	8.18
36	Maize	2	2010-12-07	6.76
59	Maize	0	2010-11-24	6.66
59	Maize	1	2010-11-30	6.7
59	Maize	2	2010-12-07	6.68
59	Maize	3	2010-12-14	6.32
73	Maize	0	2010-11-24	7.94
73	Maize	1	2010-11-30	7.76
73	Maize	2	2010-12-07	7.88
73	Maize	3	2010-12-14	7.8
83	Maize	0	2010-11-24	5.58
83	Maize	1	2010-11-30	5.4
83	Maize	2	2010-12-07	5.46
83	Maize	3	2010-12-14	5.36
109	Maize	0	2010-11-24	6.18
109	Maize	1	2010-11-30	5.84
109	Maize	2	2010-12-07	5.78
109	Maize	3	2010-12-14	4.6
118	Maize	0	2010-11-24	6.36
118	Maize	1	2010-11-30	6.54
118	Maize	2	2010-12-07	6.76
118	Maize	3	2010-12-14	6.74
