# Supplementary material for: Corn-Soy-Blend Fortified with Phosphorus to Prevent Refeeding Hypophosphatemia in Undernourished Piglets
Source: PLoS One. 2017 Jan 12;12(1):e0170043. doi: 10.1371/journal.pone.0170043 (PMC5231358; doi:10.1371/journal.pone.0170043)
Supplement: S5 Data — (XLS) [file pone.0170043.s005.xls]

## Sheet: length_RM
id	treatment	week	date	length, cm
21	CSB+	0	2010-11-24	56
21	CSB+	1	2010-11-30	61
21	CSB+	2	2010-12-07	63
21	CSB+	3	2010-12-12	61
27	CSB+	0	2010-11-24	53
27	CSB+	1	2010-11-30	55
27	CSB+	2	2010-12-07	56.2
27	CSB+	3	2010-12-12	60.5
30	CSB+	0	2010-11-24	58
30	CSB+	1	2010-11-30	57.5
30	CSB+	2	2010-12-07	57.5
30	CSB+	3	2010-12-12	62
37	CSB+	0	2010-11-24	46
37	CSB+	1	2010-11-30	47
37	CSB+	2	2010-12-07	52
37	CSB+	3	2010-12-12	50
63	CSB+	0	2010-11-24	50.2
63	CSB+	1	2010-11-30	54.5
63	CSB+	2	2010-12-07	56.9
63	CSB+	3	2010-12-12	54.2
70	CSB+	0	2010-11-24	55
70	CSB+	1	2010-11-30	55
70	CSB+	2	2010-12-07	57
70	CSB+	3	2010-12-12	56.5
81	CSB+	0	2010-11-24	50
81	CSB+	1	2010-11-30	52.5
81	CSB+	2	2010-12-07	52.4
81	CSB+	3	2010-12-12	51
97	CSB+	0	2010-11-24	57
97	CSB+	1	2010-11-30	55
97	CSB+	2	2010-12-07	59
97	CSB+	3	2010-12-12	63
113	CSB+	0	2010-11-24	57
113	CSB+	1	2010-11-30	58.9
113	CSB+	2	2010-12-07	61
113	CSB+	3	2010-12-12	61
26	CSB+ Permeate	0	2010-11-24	56
26	CSB+ Permeate	1	2010-11-30	56
26	CSB+ Permeate	2	2010-12-07	57
26	CSB+ Permeate	3	2010-12-12	57.5
64	CSB+ Permeate	0	2010-11-24	56
64	CSB+ Permeate	1	2010-11-30	57.5
64	CSB+ Permeate	2	2010-12-07	62
64	CSB+ Permeate	3	2010-12-12	59.6
65	CSB+ Permeate	0	2010-11-24	58.6
65	CSB+ Permeate	1	2010-11-30	53
65	CSB+ Permeate	2	2010-12-07	59.1
65	CSB+ Permeate	3	2010-12-12	62.4
69	CSB+ Permeate	0	2010-11-24	58.5
69	CSB+ Permeate	1	2010-11-30	57.6
69	CSB+ Permeate	2	2010-12-07	63.4
69	CSB+ Permeate	3	2010-12-12	62.5
76	CSB+ Permeate	0	2010-11-24	53.9
76	CSB+ Permeate	1	2010-11-30	51.4
76	CSB+ Permeate	2	2010-12-07	54.5
76	CSB+ Permeate	3	2010-12-12	56.7
84	CSB+ Permeate	0	2010-11-24	49.5
95	CSB+ Permeate	0	2010-11-24	54.4
95	CSB+ Permeate	1	2010-11-30	57
95	CSB+ Permeate	2	2010-12-07	59
95	CSB+ Permeate	3	2010-12-12	60.4
103	CSB+ Permeate	0	2010-11-24	56.5
103	CSB+ Permeate	1	2010-11-30	58.5
103	CSB+ Permeate	2	2010-12-07	56
103	CSB+ Permeate	3	2010-12-12	60.2
111	CSB+ Permeate	0	2010-11-24	51
111	CSB+ Permeate	1	2010-11-30	51.5
111	CSB+ Permeate	2	2010-12-07	51
111	CSB+ Permeate	3	2010-12-12	55.7
17	CSB++	0	2010-11-24	47.5
17	CSB++	1	2010-11-30	50
17	CSB++	2	2010-12-07	51.2
17	CSB++	3	2010-12-12	50.2
23	CSB++	0	2010-11-24	50.5
23	CSB++	1	2010-11-30	54.3
23	CSB++	2	2010-12-07	57
23	CSB++	3	2010-12-12	57
33	CSB++	0	2010-11-24	56
33	CSB++	1	2010-11-30	56
33	CSB++	2	2010-12-07	56.8
33	CSB++	3	2010-12-12	57.6
47	CSB++	0	2010-11-24	51.5
47	CSB++	1	2010-11-30	51
47	CSB++	2	2010-12-07	53
47	CSB++	3	2010-12-12	56.5
74	CSB++	0	2010-11-24	51.4
74	CSB++	1	2010-11-30	54
74	CSB++	2	2010-12-07	54.5
74	CSB++	3	2010-12-12	55.5
85	CSB++	0	2010-11-24	47
85	CSB++	1	2010-11-30	51
85	CSB++	2	2010-12-07	51
98	CSB++	0	2010-11-24	52
98	CSB++	1	2010-11-30	52
98	CSB++	2	2010-12-07	55.3
98	CSB++	3	2010-12-12	64.3
106	CSB++	0	2010-11-24	56
119	CSB++	0	2010-11-24	54.2
119	CSB++	1	2010-11-30	53
119	CSB++	2	2010-12-07	56
119	CSB++	3	2010-12-12	57.5
120	CSB++	0	2010-11-24	55
120	CSB++	1	2010-11-30	60
120	CSB++	2	2010-12-07	61
120	CSB++	3	2010-12-12	62.3
5	Maize	0	2010-11-24	54.5
5	Maize	1	2010-11-30	55.5
5	Maize	2	2010-12-07	54.5
5	Maize	3	2010-12-12	54.1
8	Maize	0	2010-11-24	55
8	Maize	1	2010-11-30	50
8	Maize	2	2010-12-07	55.3
8	Maize	3	2010-12-12	55.2
36	Maize	0	2010-11-24	56.5
36	Maize	1	2010-11-30	54.9
36	Maize	2	2010-12-07	56
59	Maize	0	2010-11-24	53
59	Maize	1	2010-11-30	56.5
59	Maize	2	2010-12-07	54
59	Maize	3	2010-12-12	56
73	Maize	0	2010-11-24	56
73	Maize	1	2010-11-30	57.5
73	Maize	2	2010-12-07	53.3
73	Maize	3	2010-12-12	57.7
83	Maize	0	2010-11-24	47.5
83	Maize	1	2010-11-30	47.3
83	Maize	2	2010-12-07	47.8
83	Maize	3	2010-12-12	49.2
109	Maize	0	2010-11-24	52.5
109	Maize	1	2010-11-30	52.5
109	Maize	2	2010-12-07	52.5
109	Maize	3	2010-12-12	50
118	Maize	0	2010-11-24	48.5
118	Maize	1	2010-11-30	51
118	Maize	2	2010-12-07	53.5
118	Maize	3	2010-12-12	53.2
