# Supplementary material for: Corn-Soy-Blend Fortified with Phosphorus to Prevent Refeeding Hypophosphatemia in Undernourished Piglets
Source: PLoS One. 2017 Jan 12;12(1):e0170043. doi: 10.1371/journal.pone.0170043 (PMC5231358; doi:10.1371/journal.pone.0170043)
Supplement: S6 Data — (XLS) [file pone.0170043.s006.xls]

## Sheet: P_Mg_Ca_Alb_RM
id	treatment	date	day	daymodified	p	mg	ca	albumin
21	CSB+	2010-11-24	0	0	2.28	0.74	1.14	20.36
21	CSB+	2010-11-25	1	1	1.89	0.71	1.53	19.22
21	CSB+	2010-11-26	2	2	1.67	0.68	1.72	17.86
21	CSB+	2010-11-30	6	6	1.44	0.91	2.27	19.2
21	CSB+	2010-12-07	13	13	2.03	0.89	2.4	17.85
21	CSB+	2010-12-15	21	21	2.21	0.81	2.17	17.25
27	CSB+	2010-11-24	0	0	2.34	0.79	1.14	21.54
27	CSB+	2010-11-25	1	1	1.98	0.72	1.22	19.6
27	CSB+	2010-11-26	2	2	1.75	0.91	1.78	20.51
27	CSB+	2010-11-30	6	6	1.43	0.78	2.14	16
27	CSB+	2010-12-07	13	13	1.85	0.93	2.41	14.74
27	CSB+	2010-12-15	21	21	2.42	0.88	2.3	16.47
30	CSB+	2010-11-24	0	0	2.06	0.68	1.12	18.47
30	CSB+	2010-11-25	1	1	1.88	0.66	1.31	19.33
30	CSB+	2010-11-26	2	2	1.78	0.7	1.61	18.63
30	CSB+	2010-11-30	6	6	1.07	0.72	2.2	18.78
30	CSB+	2010-12-07	13	13	1.66	0.84	2.18	15.01
30	CSB+	2010-12-15	21	21	1.73	0.78	1.98	15.17
37	CSB+	2010-11-24	0	0	1.66	0.64	1.17	17.48
37	CSB+	2010-11-25	1	1	1.42	0.65	1.36	15.17
37	CSB+	2010-11-26	2	2	1.07	0.84	1.87	15.84
37	CSB+	2010-12-07	13	13	1.72	0.81	2.15	14.11
37	CSB+	2010-12-14	20	21	2.32	0.71	1.99	17.62
63	CSB+	2010-11-24	0	0	1.32	0.58	1.21	12.82
63	CSB+	2010-11-25	1	1	1.38	0.61	1.36	14.28
63	CSB+	2010-11-26	2	2	1.05	0.72	1.83	14.31
63	CSB+	2010-11-30	6	6	1.3	0.76	1.91	13.13
63	CSB+	2010-12-07	13	13	1.52	0.79	2.33	14.35
63	CSB+	2010-12-14	20	21	1.76	0.65	1.89	15.59
70	CSB+	2010-11-24	0	0	1.78	0.62	0.99	18.92
70	CSB+	2010-11-25	1	1	1.89	0.7	1.4	21.18
70	CSB+	2010-11-26	2	2	1.87	0.78	1.95	19.84
70	CSB+	2010-11-30	6	6	1.22	0.77	2.47	19.75
70	CSB+	2010-12-07	13	13	1.43	0.9	2.58	19.33
70	CSB+	2010-12-14	20	21	1.9	0.76	2.12	19.28
81	CSB+	2010-11-25	1	1	1.91	0.6	1.17	20.91
81	CSB+	2010-11-26	2	2	1.4	0.64	1.68	21.2
81	CSB+	2010-11-30	6	6	1.34	0.73	2.27	19.53
81	CSB+	2010-12-07	13	13	1.51	0.77	2.21	17.12
81	CSB+	2010-12-14	20	21	1.59	0.68	1.93	16.39
97	CSB+	2010-11-24	0	0	1.74	0.61	1.13	22.14
97	CSB+	2010-11-25	1	1	1.81	0.58	1.19	20.13
97	CSB+	2010-11-26	2	2	1.48	0.54	1.45	19.37
97	CSB+	2010-11-30	6	6	1.13	0.72	2.58	19.91
97	CSB+	2010-12-07	13	13	1.36	0.7	2.17	17.45
97	CSB+	2010-12-15	21	21	1.66	0.75	2.15	19.66
113	CSB+	2010-11-24	0	0	1.49	0.68	1.32	19.16
113	CSB+	2010-11-25	1	1	1.37	0.69	1.49	18.58
113	CSB+	2010-11-26	2	2	1.34	0.73	1.87	18.42
113	CSB+	2010-11-30	6	6	1.2	0.86	2.4	19.67
113	CSB+	2010-12-07	13	13	1.51	0.81	2.13	15.92
113	CSB+	2010-12-15	21	21	1.82	0.74	2.01	17.89
26	CSB+ Permeate	2010-11-24	0	0	2.12	0.86	1.14	29.15
26	CSB+ Permeate	2010-11-25	1	1	2.18	0.9	1.2	27.71
26	CSB+ Permeate	2010-11-26	2	2	2.8	0.86	1.47	26.67
26	CSB+ Permeate	2010-11-30	6	6	1.36	0.81	1.86	25.25
26	CSB+ Permeate	2010-12-07	13	13	1.8	0.86	2.2	22.06
26	CSB+ Permeate	2010-12-14	20	21	2.03	0.95	2.14	21.41
64	CSB+ Permeate	2010-11-24	0	0	1.61	0.59	1.04	14.87
64	CSB+ Permeate	2010-11-25	1	1	2.05	0.7	1.23	18.36
64	CSB+ Permeate	2010-11-26	2	2	1.65	0.74	1.81	17.24
64	CSB+ Permeate	2010-11-30	6	6	1.57	0.82	2.19	16.28
64	CSB+ Permeate	2010-12-07	13	13	2.12	0.96	2.42	16.88
64	CSB+ Permeate	2010-12-15	21	21	2.48	0.79	2.25	16.17
65	CSB+ Permeate	2010-11-24	0	0	1.79	0.75	1.17	18
65	CSB+ Permeate	2010-11-25	1	1	1.79	0.78	1.26	18.42
65	CSB+ Permeate	2010-11-26	2	2	2.72	0.8	1.62	17.54
65	CSB+ Permeate	2010-11-30	6	6	1.54	0.86	1.96	16.61
65	CSB+ Permeate	2010-12-07	13	13	1.89	0.85	2.08	15.9
65	CSB+ Permeate	2010-12-15	21	21	2.69	0.88	2.08	16.65
69	CSB+ Permeate	2010-11-24	0	0	1.41	0.56	1.07	16.21
69	CSB+ Permeate	2010-11-25	1	1	1.38	0.63	1.64	18.76
69	CSB+ Permeate	2010-11-26	2	2	2.13	0.74	2.01	19.36
69	CSB+ Permeate	2010-11-30	6	6	3.04	0.8	2.22	18.51
69	CSB+ Permeate	2010-12-07	13	13	2.22	0.78	2.33	18.68
69	CSB+ Permeate	2010-12-15	21	21	2.84	0.82	2.24	17.78
76	CSB+ Permeate	2010-11-24	0	0	1.94	0.86	1.28	24.67
76	CSB+ Permeate	2010-11-25	1	1	1.97	0.82	1.25	23.25
76	CSB+ Permeate	2010-11-26	2	2	1.67	0.77	1.41	25.09
76	CSB+ Permeate	2010-11-30	6	6	1.71	0.85	1.89	23.43
76	CSB+ Permeate	2010-12-07	13	13	1.65	0.81	2	22.27
76	CSB+ Permeate	2010-12-14	20	21	1.95	0.76	1.86	18.33
84	CSB+ Permeate	2010-11-25	1	1	1.54	0.68	1.03	17.71
84	CSB+ Permeate	2010-11-26	2	2	1.38	0.74	1.38	18.03
95	CSB+ Permeate	2010-11-24	0	0	1.65	0.59	1.03	17.77
95	CSB+ Permeate	2010-11-25	1	1	1.98	0.73	1.21	20.92
95	CSB+ Permeate	2010-11-26	2	2	1.54	0.7	1.61	19.09
95	CSB+ Permeate	2010-11-30	6	6	1.48	0.95	2.38	20.65
95	CSB+ Permeate	2010-12-07	13	13	1.71	0.89	2.44	18.13
95	CSB+ Permeate	2010-12-14	20	21	2.83	0.78	2.2	20.12
103	CSB+ Permeate	2010-11-24	0	0	1.5	0.79	1.27	17.3
103	CSB+ Permeate	2010-11-25	1	1	2.77	0.64	1.46	15.03
103	CSB+ Permeate	2010-11-26	2	2	3.08	0.74	1.74	15.05
103	CSB+ Permeate	2010-11-30	6	6	1.41	0.78	2.13	11.55
103	CSB+ Permeate	2010-12-07	13	13	1.54	0.75	2.42	13.48
103	CSB+ Permeate	2010-12-15	21	21	2.46	0.76	1.86	11.64
111	CSB+ Permeate	2010-11-24	0	0	1.25	0.85	1.59	21.33
111	CSB+ Permeate	2010-11-25	1	1	1.43	0.84	1.51	19.6
111	CSB+ Permeate	2010-11-26	2	2	1.26	0.89	1.95	19.95
111	CSB+ Permeate	2010-11-30	6	6	1.54	0.88	2.12	17.52
111	CSB+ Permeate	2010-12-07	13	13	2.06	0.98	2.5	17.3
111	CSB+ Permeate	2010-12-14	20	21	2.58	0.85	2.28	16.72
17	CSB++	2010-11-24	0	0	2.45	0.8	0.99	22.73
17	CSB++	2010-11-25	1	1	2.46	0.81	1.23	23.93
17	CSB++	2010-11-26	2	2	2.08	0.73	1.39	23.64
17	CSB++	2010-11-30	6	6	2	0.99	2.13	22.24
17	CSB++	2010-12-07	13	13	2.57	0.94	2.49	21.7
17	CSB++	2010-12-15	21	21	2.88	0.79	2.45	22.07
23	CSB++	2010-11-24	0	0	1.55	0.73	1.18	23.9
23	CSB++	2010-11-25	1	1	1.38	0.75	1.5	23.95
23	CSB++	2010-11-26	2	2	1.56	0.86	2.03	23.33
23	CSB++	2010-11-30	6	6	1.84	0.9	2.15	19.62
23	CSB++	2010-12-07	13	13	3.15	0.71	2.3	17.99
23	CSB++	2010-12-15	21	21	2.37	0.89	2.32	26.18
33	CSB++	2010-11-24	0	0	2.17	0.76	1.21	18.24
33	CSB++	2010-11-25	1	1	2.24	0.75	0.96	17.05
33	CSB++	2010-11-26	2	2	1.76	0.76	1.55	17.15
33	CSB++	2010-11-30	6	6	1.24	0.78	1.93	12.84
33	CSB++	2010-12-07	13	13	2.04	0.89	2.19	14.87
33	CSB++	2010-12-15	21	21	2	0.74	2.03	12.09
47	CSB++	2010-11-24	0	0	1.93	0.66	1.12	17.72
47	CSB++	2010-11-25	1	1	1.84	0.59	0.95	17.12
47	CSB++	2010-11-26	2	2	1.97	0.59	1.14	17.47
47	CSB++	2010-12-07	13	13	2.34	0.87	2.21	12.88
47	CSB++	2010-12-15	21	21	2.69	0.78	2.06	15.01
74	CSB++	2010-11-24	0	0	1.86	0.55	1.05	18.61
74	CSB++	2010-11-25	1	1	1.75	0.55	1.27	18.43
74	CSB++	2010-11-26	2	2	1.51	0.6	1.7	18.18
74	CSB++	2010-11-30	6	6	1.64	0.89	2.14	17.56
74	CSB++	2010-12-07	13	13	2.59	0.71	2.14	15.45
74	CSB++	2010-12-15	21	21	2.82	0.82	2.1	15.85
85	CSB++	2010-11-24	0	0	1.81	0.64	1.08	18.83
85	CSB++	2010-11-25	1	1	1.56	0.64	1.55	18.62
85	CSB++	2010-11-30	6	6	1.49	0.62	1.83	10.61
85	CSB++	2010-12-07	13	13	1.63	0.63	1.37	9.81
98	CSB++	2010-11-24	0	0	2.21	0.74	1.07	24.92
98	CSB++	2010-11-25	1	1	2.34	0.89	1.31	25.66
98	CSB++	2010-11-26	2	2	1.81	0.72	1.46	24.08
98	CSB++	2010-11-30	6	6	1.95	0.9	2.15	22.3
98	CSB++	2010-12-07	13	13	1.96	0.74	2.38	20.13
98	CSB++	2010-12-15	21	21	3.14	0.77	2.28	21.06
106	CSB++	2010-11-24	0	0	1.44	0.91	1.53	34.29
106	CSB++	2010-11-25	1	1	2.61	0.93	1.73	37.11
106	CSB++	2010-11-26	2	2	2.01	0.86	1.51	37.55
119	CSB++	2010-11-24	0	0	1.22	0.49	0.99	19.17
119	CSB++	2010-11-25	1	1	1.64	0.71	1.33	22.58
119	CSB++	2010-11-26	2	2	1.58	0.67	1.48	21.76
119	CSB++	2010-11-30	6	6	1.58	0.77	1.81	19.95
119	CSB++	2010-12-07	13	13	1.38	0.75	1.97	14.76
119	CSB++	2010-12-15	21	21	1.85	0.77	2.08	17.33
120	CSB++	2010-11-24	0	0	1.61	0.75	1.24	18.06
120	CSB++	2010-11-25	1	1	1.61	0.79	1.34	19.5
120	CSB++	2010-11-26	2	2	1.53	0.78	1.7	19.07
120	CSB++	2010-11-30	6	6	1.18	0.72	1.97	13.83
120	CSB++	2010-12-07	13	13	1.36	0.67	1.93	12.91
120	CSB++	2010-12-15	21	21	1.91	0.76	2.03	15.76
5	Maize	2010-11-25	1	1	2.02	0.62	0.97	16.78
5	Maize	2010-11-26	2	2	2	0.65	1.02	18.35
5	Maize	2010-11-30	6	6	1.87	0.53	0.89	15.39
5	Maize	2010-12-07	13	13	1.94	0.62	1.09	18.06
5	Maize	2010-12-15	21	21	1.69	0.64	1.11	17.46
8	Maize	2010-11-24	0	0	2.25	0.61	0.98	18.42
8	Maize	2010-11-25	1	1	2.59	0.69	0.95	18.78
8	Maize	2010-11-26	2	2	2.41	0.7	1	19.12
8	Maize	2010-11-30	6	6	1.94	0.58	0.8	17.75
8	Maize	2010-12-15	21	21	2.22	0.8	1.1	18.79
36	Maize	2010-11-24	0	0	1.89	0.66	1.21	18.31
36	Maize	2010-11-25	1	1	2.09	0.6	1.03	17.53
36	Maize	2010-11-26	2	2	1.98	0.67	1.13	18.38
36	Maize	2010-11-30	6	6	1.9	0.67	1.23	18.86
36	Maize	2010-12-07	13	13	1.75	0.73	1.23	19.58
59	Maize	2010-11-25	1	1	2.29	0.77	1.19	19.21
59	Maize	2010-11-30	6	6	1.58	0.76	1.22	17.8
59	Maize	2010-12-07	13	13	1.82	0.79	1.39	18.41
59	Maize	2010-12-14	20	21	1.7	0.69	1.25	17
73	Maize	2010-11-24	0	0	1.91	0.65	1.05	15.64
73	Maize	2010-11-25	1	1	2.11	0.76	1.19	17.4
73	Maize	2010-11-26	2	2	2.02	0.75	1.33	16.9
73	Maize	2010-11-30	6	6	1.81	0.83	1.22	18.02
73	Maize	2010-12-07	13	13	1.84	0.67	1.16	16.84
73	Maize	2010-12-14	20	21	1.78	0.61	1.02	15.32
83	Maize	2010-11-24	0	0	1.7	0.63	0.96	14.49
83	Maize	2010-11-25	1	1	2.02	0.66	1.08	15.48
83	Maize	2010-11-26	2	2	1.86	0.64	1.14	15.36
83	Maize	2010-11-30	6	6	1.65	0.7	1.13	15.83
83	Maize	2010-12-07	13	13	1.65	0.63	1.19	14.47
83	Maize	2010-12-14	20	21	1.6	0.59	1.31	14.68
109	Maize	2010-11-24	0	0	1.35	0.75	1.51	24.08
109	Maize	2010-11-25	1	1	1.45	0.63	1.49	20.46
109	Maize	2010-11-26	2	2	1.38	0.67	1.5	20.86
109	Maize	2010-11-30	6	6	1.24	0.7	1.29	18.69
109	Maize	2010-12-07	13	13	1.19	0.71	1.45	20.11
109	Maize	2010-12-14	20	21	1.05	0.98	1.74	24.1
118	Maize	2010-11-24	0	0	1.5	0.69	1.13	18.31
118	Maize	2010-11-25	1	1	1.71	0.75	1.3	21.82
118	Maize	2010-11-26	2	2	1.7	0.79	1.31	20.18
118	Maize	2010-11-30	6	6	1.5	0.81	1.45	21.59
118	Maize	2010-12-07	13	13	1.78	0.81	1.44	19.43
118	Maize	2010-12-14	20	21	1.53	0.78	1.28	17.99
