# Supplementary material for: Corn-Soy-Blend Fortified with Phosphorus to Prevent Refeeding Hypophosphatemia in Undernourished Piglets
Source: PLoS One. 2017 Jan 12;12(1):e0170043. doi: 10.1371/journal.pone.0170043 (PMC5231358; doi:10.1371/journal.pone.0170043)
Supplement: S7 Data — (XLS) [file pone.0170043.s007.xls]

## Sheet: Feed intake
treatment	real_pen	week	feedtake per week, kg	feeddays	avg feedintake per pig per day, g
CSB+	3	1	6.42	24	267.5
CSB+	3	2	8.68	28	310
CSB+	3	3	8.42	28	300.714
CSB+	6	1	11.7	30	390
CSB+	6	2	13.1	35	374.286
CSB+	6	3	17.24	40	431
CSB+/P	1	1	4.3	29	148.276
CSB+/P	1	2	8.34	28	297.857
CSB+/P	1	3	6.5	28	232.143
CSB+/P	8	1	7.56	24	315
CSB+/P	8	2	9.26	28	330.714
CSB+/P	8	3	11.84	32	370
CSB++	4	1	6.52	28	232.857
CSB++	4	2	8.02	28	286.429
CSB++	4	3	9.16	26	352.308
CSB++	7	1	7.84	30	261.333
CSB++	7	2	11.32	35	323.429
CSB++	7	3	15.36	40	384
Maize	2	1	4.42	30	147.333
Maize	2	2	7.52	35	214.857
Maize	2	3	6.28	35	179.429
Maize	5	1	3.48	18	193.333
Maize	5	2	3.4	21	161.905
Maize	5	3	3.54	20	177
