# Supplementary material for: Corn-Soy-Blend Fortified with Phosphorus to Prevent Refeeding Hypophosphatemia in Undernourished Piglets
Source: PLoS One. 2017 Jan 12;12(1):e0170043. doi: 10.1371/journal.pone.0170043 (PMC5231358; doi:10.1371/journal.pone.0170043)
Supplement: S8 Data — (XLS) [file pone.0170043.s008.xls]

## Sheet: Euthanasia_data
id	treatment	fat mass, g	lean mass, g	DEXA sum, g	%Fat, %	BMC	BMD	kill weight, kg	liver, g	spleen, g	lungs, g	heart, g	kidneys, g	small intestine, g	kill_date	u-calcium, g/100g	u-phosphorus, g/100g
21	CSB+	1596.4	10798.6	12561	12.7091	166.05	0.380447	13.02	504	62.3	128.4	111.3	66.4	522	2010-12-15
27	CSB+	1209.1	7989.7	9338.86	12.947	140.06	0.35229	10.24	408	42.1	122.9	61.5	62.8	516	2010-12-15	0.0292	0.0003
30	CSB+	2017.3	9120.6	11267.5	17.9037	129.6	0.342214	12.04	384	52.8	142.3	83	71.1	556	2010-12-15	0.0675	0.0011
37	CSB+	800.7	5148.1	6047.48	13.2402	98.68	0.313978	6.44	265	28.6	101	43.8	41.1	362	2010-12-14
63	CSB+	1037.6	6770.8	7913.84	13.1112	105.44	0.30534	8.02	250	46.6	91	58.3	44	395	2010-12-14	0.0003	0.0003
70	CSB+							9.48	373	44.8	125.8	76	56	501	2010-12-14	0.001	0.0001
81	CSB+	979.4	6146.3	7211.47	13.5811	85.77	0.264959	7.84	306	50.5	91.4	50.6	48.6	431	2010-12-14	0.0187	0.001
97	CSB+	1889.4	10173.6	12203.2	15.4828	140.25	0.355576	13.3	467	58.7	144.7	81.2	81.3	550	2010-12-15	0.0058	0.0013
113	CSB+	1596.9	9387.9	11122.2	14.3578	137.38	0.351454	11.9	450	76.6	141.1	76.2	60.1	480	2010-12-15	0.0117	0.0016
26	CSB+ Permeate	949.6	5419.5	6502.39	14.6039	133.29	0.326235	7.26	277.8	25.2	90.2	45.8	54	399	2010-12-14	0.0973	0.0024
64	CSB+ Permeate	2216	9786.5	12129	18.2703	126.47	0.331542	12.94	462	94.8	129.3	75.9	74.3	586	2010-12-15	0.0178	0.0011
65	CSB+ Permeate	1340.5	8202.9	9680.74	13.8471	137.34	0.338426	10.24	364	62.8	127.2	53.9	61	374	2010-12-15	0.034	0.007
69	CSB+ Permeate	1499.1	8983	10631.3	14.1009	149.17	0.361624	11.48	469	71.5	133.2	87.5	65	600	2010-12-15	0.0104	0.002
76	CSB+ Permeate	1006.9	6724.6	7819.21	12.8773	87.71	0.304591	8.18	284.6	48.5	93.7	68.3	55.4	377.3	2010-12-14	0.0112	0.009
95	CSB+ Permeate	1467.6	7341.3	8930.71	16.4332	121.81	0.31998	10.02	397	63.5	119	64.8	60	446	2010-12-14	0.0136	0.0071
103	CSB+ Permeate	1118.4	6998.5	8271.12	13.5217	154.22	0.330441	8.9	318	45.4	106.4	68.5	54.7	428	2010-12-15	0.0176	0.0048
111	CSB+ Permeate	770.7	5645	6538.47	11.7872	122.77	0.311567	7.16	282.9	27.3	97.3	57	56.5	386	2010-12-14	0.0174	0.0327
17	CSB++	1190.1	6868.9	8171.63	14.5638	112.63	0.332979	8.88	332	37.7	110.6	74.3	55	490	2010-12-15	0.0114	0.0022
23	CSB++	1294	6804.3	8240.48	15.703	142.18	0.320847	7.7	347.6	43.9	99.2	64.5	44.3	430	2010-12-15
33	CSB++	1474	8851.5	10476.2	14.07	150.68	0.349638	10.58	341	54.6	112.7	74.3	57.3	382	2010-12-15	0.0094	0.0015
47	CSB++	1076.8	6854.8	8058.14	13.3629	126.54	0.314862	8.42	297	25.6	93.5	64.6	51	435	2010-12-15	0.004	0.062
74	CSB++	1210.1	8006.1	9351.71	12.9399	135.51	0.340846	10.52	430.7	64.5	125.5	65.3	71.5	562	2010-12-15	0.0525	0.0025
98	CSB++	1915.3	11289.6	13373.9	14.3212	169.02	0.396528	14.82	539	63.1	153.5	117.6	80.4	691	2010-12-15	0.001	0.0021
119	CSB++	1556.8	8085.4	9748.39	15.9698	106.19	0.315403	10.46	364	58.8	108	80.9	76.3	487	2010-12-15	0.0175	0.0015
120	CSB++	1514	8434	10077.2	15.024	129.2	0.32023	10.7	397	45	118.2	73.7	67.1	570	2010-12-15	0.0043	0.0015
5	Maize	956.2	6701.6	7758.37	12.3248	100.57	0.305851	7.96	227.1	22.8	91.7	55.5	46.9	363	2010-12-15	0.0038	0.1794
8	Maize	992.3	6715.9	7840.82	12.6556	132.62	0.306607	8.38	288	33.1	114.6	45.5	55.3	334	2010-12-15	0.0019	0.1394
59	Maize	817.6	5223.2	6144.27	13.3067	103.47	0.300313	6.32	169.5	29.4	75.9	40.6	31.7	292	2010-12-14	0.004	0.0821
73	Maize	921.3	6530.9	7549.22	12.2039	97.02	0.310255	7.8	247	25.1	105.3	63.4	37.9	330	2010-12-14	0.0092	0.0813
83	Maize	645.7	4394	5101.92	12.656	62.22	0.293837	5.36	182	12.6	72.6	35.3	43.8	259	2010-12-14	0.0065	0.0905
109	Maize	697.9	3932	4702.99	14.8395	73.09	0.329873	4.6	138	8.2	71.9	31.1	26.6	250	2010-12-14	0.0085	0.1353
118	Maize	919.1	5418.9	6409.73	14.3391	71.73	0.266545	6.74	209.6	21.1	91.8	48.8	34.1	300	2010-12-14	0.0115	0.1686
